# Supplementary material
Source: Research Square preprint supplement (doi:10.21203/rs.3.rs-9002886/v1)
Supplement: Supplementary file 1 [file d45d5e27ee3d370061c111c7.docx]

| **Comparison** | **SMA** | **SMA/WT** | **SMI** | **SMA/BMI** | **SMD** | **VAT** | **SAT** | **TAT** | **TATI** | **VATI** |
| --- | --- | --- | --- | --- | --- | --- | --- | --- | --- | --- |
| Northeast vs North | 0.265 | 1.000 | 0.080 | 1.000 | 0.164 | **0.007** | 0.591 | 0.064 | 0.148 | **0.006** |
| Northeast vs Center-West | 1.000 | **<0.001** | 0.090 | 1.000 | **0.002** | **<0.001** | **0.001** | **<0.001** | **<0.001** | **<0.001** |
| Northeast vs Southeast | **<0.001** | **<0.001** | **0.001** | **<0.001** | **<0.001** | **<0.001** | **0.011** | **<0.001** | **0.001** | **<0.001** |
| Northeast vs South | 1.000 | **<0.001** | 1.000 | 0.246 | **<0.001** | **<0.001** | **<0.001** | **<0.001** | **<0.001** | **<0.001** |
| North vs Center-West | 1.000 | **<0.001** | **<0.001** | 1.000 | **<0.001** | 0.826 | 1.000 | 0.717 | 1.000 | 0.300 |
| North vs Southeast | **0.003** | **0.018** | 1.000 | **<0.001** | **<0.001** | **0.018** | **0.001** | **0.001** | **<0.001** | **0.001** |
| North vs South | 1.000 | **<0.001** | 0.274 | 0.098 | **<0.001** | **0.045** | 0.122 | **0.010** | **0.018** | 0.066 |
| Center-West vs Southeast | **<0.001** | **<0.001** | **<0.001** | **<0.001** | **<0.001** | **<0.001** | **<0.001** | **<0.001** | **<0.001** | **<0.001** |
| Center-West vs South | 1.000 | 1.000 | 0.598 | 0.470 | 0.988 | 1.000 | 0.356 | 0.420 | **0.047** | 0.303 |
| Southeast vs South | **<0.001** | **<0.001** | **0.009** | **<0.001** | **<0.001** | **<0.001** | **<0.001** | **<0.001** | **<0.001** | **<0.001** |

**Supplementary Table 1.** Pairwise comparisons between regions (Bonferroni-adjusted *p* values) – All participants.

**Note:** *p* values in **bold** indicate statistical significance (p<0.05).

**Supplementary Table 2.** Differences in body composition by region, adjusted for sex and age. Results from linear regression analysis using the Northeast region as the reference category.

| **Variables** | β | 95% CI Lower | 95% CI Upper | *p* value |
| --- | --- | --- | --- | --- |
| **SMA (cm2)** |  |  |  |  |
| North | 2.763 | -1.481 | 7.007 | 0.202 |
| Center-West | 3.104 | 0.016 | 6.192 | **0.049** |
| Southeast | 1.215 | -3.259 | 5.688 | 0.594 |
| South | 3.949 | 0.128 | 7.770 | **0.043** |
| **SMA/WT (cm2/kg)** |  |  |  |  |
| North | -0.012 | -0.065 | 0.040 | 0.649 |
| Center-West | -0.128 | -0.166 | -0.090 | **<0.001** |
| Southeast | -0.007 | -0.062 | 0.048 | 0.807 |
| South | -0.140 | -0.187 | -0.093 | **<0.001** |
| **SMI** **(cm2/m2)** |  |  |  |  |
| North | 1.354 | -0.154 | 2.861 | 0.078 |
| Center-West | -2.218 | -3.315 | -1.121 | **<0.001** |
| Southeast | -1.448 | -3.037 | 0.141 | 0.074 |
| South | -0.227 | -1.584 | 1.130 | 0.743 |
| **SMA/BMI (cm²/(kg/m²))** |  |  |  |  |
| North | -0.069 | -0.218 | 0.080 | 0.362 |
| Center-West | -0.011 | -0.119 | 0.097 | 0.843 |
| Southeast | 0.192 | 0.035 | 0.349 | **0.016** |
| South | -0.206 | -0.340 | -0.073 | **0.003** |
| **SMD (HU)** |  |  |  |  |
| North | 1.224 | 0.059 | 2.390 | **0.040** |
| Center-West | -0.732 | -1.580 | 0.116 | 0.091 |
| Southeast | 4.769 | 3.540 | 5.998 | **<0.001** |
| South | -1.078 | -2.128 | -0.029 | **0.044** |
| **VAT (cm2)** |  |  |  |  |
| North | 18.827 | 5.550 | 32.105 | **0.005** |
| Center-West | 34.713 | 25.052 | 44.374 | **<0.001** |
| Southeast | -8.993 | -22.989 | 5.003 | 0.208 |
| South | 37.785 | 25.830 | 49.739 | **<0.001** |
| **SAT (cm2)** |  |  |  |  |
| North | 22.379 | 4.621 | 40.136 | **0.014** |
| Center-West | 24.678 | 11.758 | 37.599 | **<0.001** |
| Southeast | -5.552 | -24.270 | 13.166 | 0.561 |
| South | 54.967 | 38.979 | 70.955 | **<0.001** |
| **TAT (cm2)** |  |  |  |  |
| North | 42.233 | 13.962 | 70.504 | **0.003** |
| Center-West | 60.793 | 40.222 | 81.364 | **<0.001** |
| Southeast | -14.831 | -44.633 | 14.970 | 0.329 |
| South | 93.923 | 68.469 | 119.377 | **<0.001** |
| **TATI (cm2/m2)** |  |  |  |  |
| North | 16.207 | 5.896 | 26.518 | **0.002** |
| Center-West | 12.551 | 5.049 | 20.054 | **0.001** |
| Southeast | -7.978 | -18.847 | 2.891 | 0.150 |
| South | 30.093 | 20.809 | 39.377 | **<0.001** |
| **VATI (cm2/m2)** |  |  |  |  |
| North | 7.038 | 2.269 | 11.806 | **0.004** |
| Center-West | 8.429 | 4.959 | 11.899 | **<0.001** |
| Southeast | -4.164 | -9.191 | 0.863 | 0.104 |
| South | 12.050 | 7.757 | 16.344 | **<0.001** |

**Supplementary Table 3.** Differences in body composition by region, adjusted for sex and stratified by age (18-39 years). Results from linear regression analysis using the Northeast region as the reference category.

| **Variables** | β | 95% CI Lower | 95% CI Upper | *p* value |
| --- | --- | --- | --- | --- |
| **SMA (cm2)** |  |  |  |  |
| North | -6.333 | -14.248 | 1.582 | 0.117 |
| Center-West | -1.380 | -7.297 | 4.536 | 0.647 |
| Southeast | -0.358 | -7.000 | 6.284 | 0.916 |
| South | -0.969 | -9.032 | 7.094 | 0.813 |
| **SMA/WT (cm2/kg)** |  |  |  |  |
| North | -0.011 | -0.114 | 0.092 | 0.835 |
| Center-West | -0.145 | -0.222 | -0.068 | **<0.001** |
| Southeast | -0.025 | -0.112 | 0.061 | 0.564 |
| South | -0.159 | -0.264 | -0.054 | **0.003** |
| **SMI** **(cm2/m2)** |  |  |  |  |
| North | -0.670 | -3.462 | 2.122 | 0.637 |
| Center-West | -2.686 | -4.773 | -0.599 | **0.012** |
| Southeast | -1.126 | -3.469 | 1.217 | 0.346 |
| South | -1.778 | -4.622 | 1.066 | 0.220 |
| **SMA/BMI (cm²/(kg/m²))** |  |  |  |  |
| North | -0.178 | -0.475 | 0.119 | 0.239 |
| Center-West | -0.169 | -0.391 | 0.053 | 0.135 |
| Southeast | 0.048 | -0.201 | 0.297 | 0.705 |
| South | -0.289 | -0.591 | 0.014 | 0.061 |
| **SMD (HU)** |  |  |  |  |
| North | 1.709 | -0.260 | 3.678 | 0.089 |
| Center-West | -2.038 | -3.510 | -0.566 | **0.007** |
| Southeast | 5.198 | 3.545 | 6.850 | **<0.001** |
| South | -1.877 | -3.883 | 0.129 | 0.067 |
| **VAT (cm2)** |  |  |  |  |
| North | 9.415 | -9.368 | 28.197 | 0.325 |
| Center-West | 35.390 | 21.350 | 49.430 | **<0.001** |
| Southeast | -1.760 | -17.521 | 14.001 | 0.826 |
| South | 35.579 | 16.445 | 54.714 | **<0.001** |
| **SAT (cm2)** |  |  |  |  |
| North | 3.360 | -30.062 | 36.782 | 0.844 |
| Center-West | 27.181 | 2.198 | 52.164 | **0.033** |
| Southeast | 1.554 | -26.492 | 29.600 | 0.913 |
| South | 80.658 | 46.610 | 114.706 | **<0.001** |
| **TAT (cm2)** |  |  |  |  |
| North | 13.703 | -35.197 | 62.603 | 0.582 |
| Center-West | 65.312 | 28.759 | 101.865 | **<0.001** |
| Southeast | 0.613 | -40.422 | 41.647 | 0.977 |
| South | 118.755 | 68.939 | 168.571 | **<0.001** |
| **TATI (cm2/m2)** |  |  |  |  |
| North | 8.439 | -9.091 | 25.969 | 0.345 |
| Center-West | 19.051 | 5.947 | 32.154 | **0.004** |
| Southeast | -0.154 | -14.865 | 14.556 | 0.984 |
| South | 40.589 | 22.731 | 58.448 | **<0.001** |
| **VATI (cm2/m2)** |  |  |  |  |
| North | 4.405 | -2.106 | 10.917 | 0.184 |
| Center-West | 10.856 | 5.988 | 15.723 | **<0.001** |
| Southeast | -0.690 | -6.154 | 4.774 | 0.804 |
| South | 11.819 | 5.185 | 18.453 | **0.001** |

**Supplementary Table 4. Reference Cutoffs for Muscle and Adipose Tissue Parameters – South Region**

|  |  | **Male** | | | **Female** | | |
| --- | --- | --- | --- | --- | --- | --- | --- |
| **Variable** | **Cutoff Type** | **n** | **Mean ± sd** | **Cutoff** | **n** | **Mean ± sd** | **Cutoff** |
|  |  | **Muscle** | | | | | |
| **SMA (cm²)** | Low (- 1 sd) | 17 | 167.8 ± 29.1 | 138.7 | 27 | 122.8 ± 18.5 | 104.3 |
| Very Low (- 2 sd) | 109.6 | 85.8 |
| **SMD (HU)** | Low (- 1 sd) | 17 | 46.7 ± 4.5 | 42.1 | 27 | 40.6 ± 4.6 | 36.0 |
| Very Low (- 2 sd) | 37.6 | 31.4 |
| **SMI (cm²/m²)** | Low (- 1 sd) | 17 | 54.6 ± 8.5 | 46.1 | 27 | 45.9 ± 5.9 | 40.0 |
| Very Low (- 2 sd) | 37.6 | 34.1 |
| **SMA/wt (cm²/kg)** | Low (- 1 sd) | 17 | 2.25 ± 0.38 | 1.87 | 25 | 1.57 ± 0.22 | 1.36 |
| Very Low (- 2 sd) | 1.49 | 1.15 |
| **SMA/BMI (cm²/(kg/m²))** | Low (- 1 sd) | 17 | 6.87 ± 1.07 | 5.80 | 25 | 4.25 ± 0.62 | 3.63 |
| Very Low (- 2 sd) | 4.73 | 3.01 |
|  |  | **Adipose Tissue** | | | | | |
| **IMAT (cm²)** | High (+ 1sd) | 16 | 5.48 ± 3.71 | 9.19 | 26 | 8.00 ± 4.30 | 12.30 |
| Very High (+ 2 sd) | 12.90 | 16.60 |
| **VAT (cm²)** | High (+ 1sd) | 16 | 69.8 ± 65.0 | 134.8 | 23 | 80.0 ± 41.4 | 121.4 |
| Very High (+ 2 sd) | 199.8 | 162.8 |
| **SAT (cm²)** | High (+ 1sd) | 17 | 125.8 ± 114.8 | 240.6 | 23 | 264.4 ± 94.8 | 359.2 |
| Very High (+ 2 sd) | 355.4 | 454.0 |
| **TAT (cm²)** | High (+ 1sd) | 16 | 187.4 ± 161.1 | 348.5 | 24 | 375.1 ± 152.4 | 527.5 |
| Very High (+ 2 sd) | 509.5 | 679.9 |
| **TATI (cm²/m²)** | High (+ 1sd) | 17 | 69.0 ± 60.0 | 129.0 | 25 | 145.4 ± 59.2 | 204.6 |
| Very High (+ 2 sd) | 189.0 | 263.8 |
| **VATI (cm²/m²)** | High (+ 1sd) | 16 | 22.4 ± 20.4 | 42.8 | 23 | 29.9 ± 14.8 | 44.7 |
| Very High (+ 2 sd) | 63.2 | 59.5 |

|  |  | **Male** | | | **Female** | | |
| --- | --- | --- | --- | --- | --- | --- | --- |
| **Variable** | **Cutoff Type** | **n** | **Mean ± sd** | **Cutoff** | **n** | **Mean ± sd** | **Cutoff** |
|  |  | **Muscle** | | | | | |
| **SMA (cm²)** | Low (- 1 sd) | 58 | 179.4 ± 23.9 | 155.5 | 16 | 113.6 ± 12.1 | 101.5 |
| Very Low (- 2 sd) | 131.6 | 89.4 |
| **SMD (HU)** | Low (- 1 sd) | 50 | 51.9 ± 7.4 | 44.5 | 16 | 44.5 ± 8.3 | 36.2 |
| Very Low (- 2 sd) | 37.1 | 27.9 |
| **SMI (cm²/m²)** | Low (- 1 sd) | 58 | 58.8 ± 8.6 | 50.2 | 16 | 43.5 ± 5.2 | 38.3 |
| Very Low (- 2 sd) | 41.6 | 33.1 |
| **SMA/wt (cm²/kg)** | Low (- 1 sd) | 58 | 2.32 ± 0.33 | 1.99 | 16 | 1.73 ± 0.24 | 1.49 |
| Very Low (- 2 sd) | 1.66 | 1.25 |
| **SMA/BMI (cm²/(kg/m²))** | Low (- 1 sd) | 58 | 7.08 ± 0.93 | 6.15 | 16 | 4.52 ± 0.69 | 3.83 |
| Very Low (- 2 sd) | 5.22 | 3.14 |
|  |  | **Adipose Tissue** | | | | | |
| **IMAT (cm²)** | High (+ 1sd) | 54 | 4.58 ± 3.65 | 8.23 | 16 | 5.14 ± 3.43 | 8.56 |
| Very High (+ 2 sd) | 11.88 | 11.99 |
| **VAT (cm²)** | High (+ 1sd) | 58 | 72.3 ± 61.1 | 133.4 | 16 | 52.4 ± 41.2 | 93.6 |
| Very High (+ 2 sd) | 194.5 | 134.8 |
| **SAT (cm²)** | High (+ 1sd) | 58 | 124.9 ± 99.2 | 224.1 | 16 | 203.9 ± 114.7 | 318.6 |
| Very High (+ 2 sd) | 323.3 | 433.3 |
| **TAT (cm²)** | High (+ 1sd) | 58 | 203.0 ± 156.5 | 359.5 | 16 | 261.5 ± 154.0 | 415.5 |
| Very High (+ 2 sd) | 516.0 | 569.5 |
| **TATI (cm²/m²)** | High (+ 1sd) | 58 | 66.0 ± 50.6 | 116.6 | 16 | 102.0 ± 67.7 | 169.7 |
| Very High (+ 2 sd) | 167.2 | 237.4 |
| **VATI (cm²/m²)** | High (+ 1sd) | 58 | 23.6 ± 20.3 | 43.9 | 16 | 20.7 ± 18.1 | 38.8 |
| Very High (+ 2 sd) | 64.2 | 56.9 |

**Supplementary Table 5. Reference Cutoffs for Muscle and Adipose Tissue Parameters – Southeast Region**

|  |  | **Male** | | | **Female** | | |
| --- | --- | --- | --- | --- | --- | --- | --- |
| **Variable** | **Cutoff Type** | **n** | **Mean ± sd** | **Cutoff** | **n** | **Mean ± sd** | **Cutoff** |
|  |  | **Muscle** | | | | | |
| **SMA (cm²)** | Low (- 1 sd) | 25 | 175.2 ± 27.6 | 147.7 | 21 | 107.8 ± 18.3 | 89.5 |
| Very Low (- 2 sd) | 120.2 | 71.2 |
| **SMD (HU)** | Low (- 1 sd) | 25 | 49.1 ± 2.7 | 46.3 | 21 | 45.2 ± 3.7 | 41.4 |
| Very Low (- 2 sd) | 43.6 | 37.7 |
| **SMI (cm²/m²)** | Low (- 1 sd) | 24 | 59.3 ± 10.2 | 49.2 | 20 | 42.0 ± 6.5 | 35.5 |
| Very Low (- 2 sd) | 39.0 | 29.0 |
| **SMA/wt (cm²/kg)** | Low (- 1 sd) | 25 | 2.37 ± 0.34 | 2.03 | 21 | 1.74 ± 0.23 | 1.51 |
| Very Low (- 2 sd) | 1.69 | 1.28 |
| **SMA/BMI (cm²/(kg/m²))** | Low (- 1 sd) | 25 | 6.90 ± 1.01 | 5.89 | 21 | 4.38 ± 0.63 | 3.75 |
| Very Low (- 2 sd) | 4.88 | 3.12 |
|  |  | **Adipose Tissue** | | | | | |
| **IMAT (cm²)** | High (+ 1sd) | 25 | 5.61 ± 2.96 | 8.57 | 20 | 5.65 ± 2.65 | 8.30 |
| Very High (+ 2 sd) | 11.52 | 10.95 |
| **VAT (cm²)** | High (+ 1sd) | 25 | 87.5 ± 64.3 | 151.8 | 20 | 46.3 ± 38.9 | 85.2 |
| Very High (+ 2 sd) | 216.1 | 124.1 |
| **SAT (cm²)** | High (+ 1sd) | 25 | 128.3 ± 84.8 | 213.1 | 21 | 194.1 ± 110.9 | 305.0 |
| Very High (+ 2 sd) | 297.9 | 415.9 |
| **TAT (cm²)** | High (+ 1sd) | 25 | 221.4 ± 140.2 | 361.6 | 21 | 254.2 ± 156.3 | 410.5 |
| Very High (+ 2 sd) | 501.8 | 566.8 |
| **TATI (cm²/m²)** | High (+ 1sd) | 25 | 76.7 ± 49.8 | 126.5 | 20 | 93.1 ± 52.4 | 145.5 |
| Very High (+ 2 sd) | 176.3 | 197.9 |
| **VATI (cm²/m²)** | High (+ 1sd) | 25 | 30.4 ± 22.9 | 53.3 | 20 | 18.4 ± 15.1 | 33.5 |
| Very High (+ 2 sd) | 76.2 | 48.6 |

**Supplementary Table 6. Reference Cutoffs for Muscle and Adipose Tissue Parameters – North Region**

|  |  | **Male** | | | **Female** | | |
| --- | --- | --- | --- | --- | --- | --- | --- |
| **Variable** | **Cutoff Type** | **n** | **Mean ± sd** | **Cutoff** | **n** | **Mean ± sd** | **Cutoff** |
|  |  | **Muscle** | | | | | |
| **SMA (cm²)** | Low (- 1 sd) | 132 | 180.3 ± 31.1 | 149.2 | 161 | 116.0 ± 17.2 | 98.8 |
| Very Low (- 2 sd) | 118.1 | 81.5 |
| **SMD (HU)** | Low (- 1 sd) | 133 | 47.1 ± 4.9 | 42.2 | 161 | 43.2 ± 5.5 | 37.7 |
| Very Low (- 2 sd) | 37.3 | 32.2 |
| **SMI (cm²/m²)** | Low (- 1 sd) | 133 | 59.5 ± 10.5 | 49.0 | 159 | 44.9 ± 6.4 | 38.5 |
| Very Low (- 2 sd) | 38.5 | 32.1 |
| **SMA/wt (cm²/kg)** | Low (- 1 sd) | 133 | 2.31 ± 0.34 | 1.97 | 160 | 1.81 ± 0.28 | 1.53 |
| Very Low (- 2 sd) | 1.63 | 1.24 |
| **SMA/BMI (cm²/(kg/m²))** | Low (- 1 sd) | 132 | 6.92 ± 1.02 | 5.90 | 158 | 4.66 ± 0.71 | 3.94 |
| Very Low (- 2 sd) | 4.88 | 3.23 |
|  |  | **Adipose Tissue** | | | | | |
| **IMAT (cm²)** | High (+ 1sd) | 131 | 4.57 ± 3.33 | 7.90 | 158 | 4.54 ± 3.12 | 7.66 |
| Very High (+ 2 sd) | 11.23 | 10.78 |
| **VAT (cm²)** | High (+ 1sd) | 134 | 75.3 ± 66.4 | 141.7 | 163 | 46.3 ± 39.6 | 85.9 |
| Very High (+ 2 sd) | 208.1 | 125.5 |
| **SAT (cm²)** | High (+ 1sd) | 134 | 136.4 ± 88.7 | 225.1 | 163 | 178.2 ± 102.4 | 280.6 |
| Very High (+ 2 sd) | 313.8 | 383.0 |
| **TAT (cm²)** | High (+ 1sd) | 134 | 216.6 ± 143.2 | 359.8 | 164 | 233.1 ± 144.8 | 377.8 |
| Very High (+ 2 sd) | 503.0 | 522.6 |
| **TATI (cm²/m²)** | High (+ 1sd) | 134 | 72.2 ± 47.3 | 119.5 | 163 | 89.7 ± 54.9 | 144.6 |
| Very High (+ 2 sd) | 166.8 | 199.5 |
| **VATI (cm²/m²)** | High (+ 1sd) | 134 | 25.1 ± 21.9 | 47.0 | 162 | 17.8 ± 15.2 | 33.0 |
| Very High (+ 2 sd) | 68.9 | 48.3 |

**Supplementary Table 7. Reference Cutoffs for Muscle and Adipose Tissue Parameters – Northeast Region**

|  |  | **Male** | | | **Female** | | |
| --- | --- | --- | --- | --- | --- | --- | --- |
| **Variable** | **Cutoff Type** | **n** | **Mean ± sd** | **Cutoff** | **n** | **Mean ± sd** | **Cutoff** |
| **Muscle** | | | | | | | |
| **SMA (cm²)** | Low (- 1 sd) | 51 | 177.9 ± 31.2 | 146.7 | 42 | 113.9 ± 17.4 | 96.5 |
| Very Low (- 2 sd) | 115.5 | 79.1 |
| **SMD (HU)** | Low (- 1 sd) | 51 | 45.5 ± 5.5 | 40.0 | 41 | 42.0 ± 3.6 | 38.4 |
| Very Low (- 2 sd) | 34.5 | 34.8 |
| **SMI (cm²/m²)** | Low (- 1 sd) | 51 | 56.7 ± 10.5 | 46.2 | 43 | 43.3 ± 6.4 | 36.9 |
| Very Low (- 2 sd) | 35.8 | 30.5 |
| **SMA/wt (cm²/kg)** | Low (- 1 sd) | 51 | 2.15 ± 0.32 | 1.83 | 43 | 1.71 ± 0.25 | 1.47 |
| Very Low (- 2 sd) | 1.51 | 1.22 |
| **SMA/BMI (cm²/(kg/m²))** | Low (- 1 sd) | 50 | 6.70 ± 0.94 | 5.76 | 43 | 4.57 ± 0.76 | 3.81 |
| Very Low (- 2 sd) | 4.82 | 3.05 |
| **Adipose tissue** | | | | | | | |
| **IMAT (cm²)** | High (+ 1sd) | 49 | 6.42 ± 3.69 | 10.11 | 38 | 6.08 ± 3.13 | 9.21 |
| Very High (+ 2 sd) | 13.80 | 12.34 |
| **VAT (cm²)** | High (+ 1sd) | 49 | 115.9 ± 75.1 | 191.0 | 39 | 53.5 ± 30.2 | 83.7 |
| Very High (+ 2 sd) | 266.1 | 113.9 |
| **SAT (cm²)** | High (+ 1sd) | 51 | 163.8 ± 108.0 | 271.8 | 42 | 194.0 ± 89.2 | 283.1 |
| Very High (+ 2 sd) | 379.8 | 372.2 |
| **TAT (cm²)** | High (+ 1sd) | 49 | 278.5 ± 165.2 | 443.7 | 42 | 266.3 ± 110.6 | 376.9 |
| Very High (+ 2 sd) | 608.8 | 487.5 |
| **TATI (cm²/m²)** | High (+ 1sd) | 51 | 93.5 ± 56.4 | 149.9 | 42 | 100.8 ± 45.7 | 146.5 |
| Very High (+ 2 sd) | 206.3 | 192.2 |
| **VATI (cm²/m²)** | High (+ 1sd) | 51 | 39.6 ± 26.7 | 66.3 | 41 | 22.4 ± 14.9 | 37.3 |
| Very High (+ 2 sd) | 93.0 | 52.2 |

**Supplementary Table 8. Reference Cutoffs for Muscle and Adipose Tissue Parameters – Center-West Region**
